# Supplementary material for: Elevated Soluble Suppressor of Tumorigenicity 2 Predict Hospital Admissions Due to Major Adverse Cardiovascular Events (MACE)
Source: MDPI journal article supplement (doi:10.3390/jcm12082790), 2023-04-09
Supplement: s1 [file s1]

**Supplementary Table S1. Incidence of MACE by co-morbidity**

| <b>Co-morbidities</b>                       | <b>Incidence<br/>in total<br/>cohort<br/>(n=250)</b> | <b>MACE incidence<br/>amongst those with<br/>the comorbidity n (%)</b> | <b>P value</b> |
|---------------------------------------------|------------------------------------------------------|------------------------------------------------------------------------|----------------|
| Hypertension, n (%)                         | 119 (48%)                                            | 67 (56%)                                                               | 0.076          |
| Dyslipidemia, n (%)                         | 76 (30%)                                             | 43 (57%)                                                               | 0.216          |
| Heart failure, n (%)                        | 69 (28%)                                             | 39 (57%)                                                               | 0.258          |
| Diabetes Mellitus, n (%)                    | 67 (27%)                                             | 46 (67%)                                                               | 0.001          |
| Ischemic heart disease <sup>3</sup> , n (%) | 222 (89%)                                            | 113 (51%)                                                              | 0.548          |
| Atrial Fibrillation, n (%)                  | 44 (18%)                                             | 23 (52%)                                                               | 0.868          |

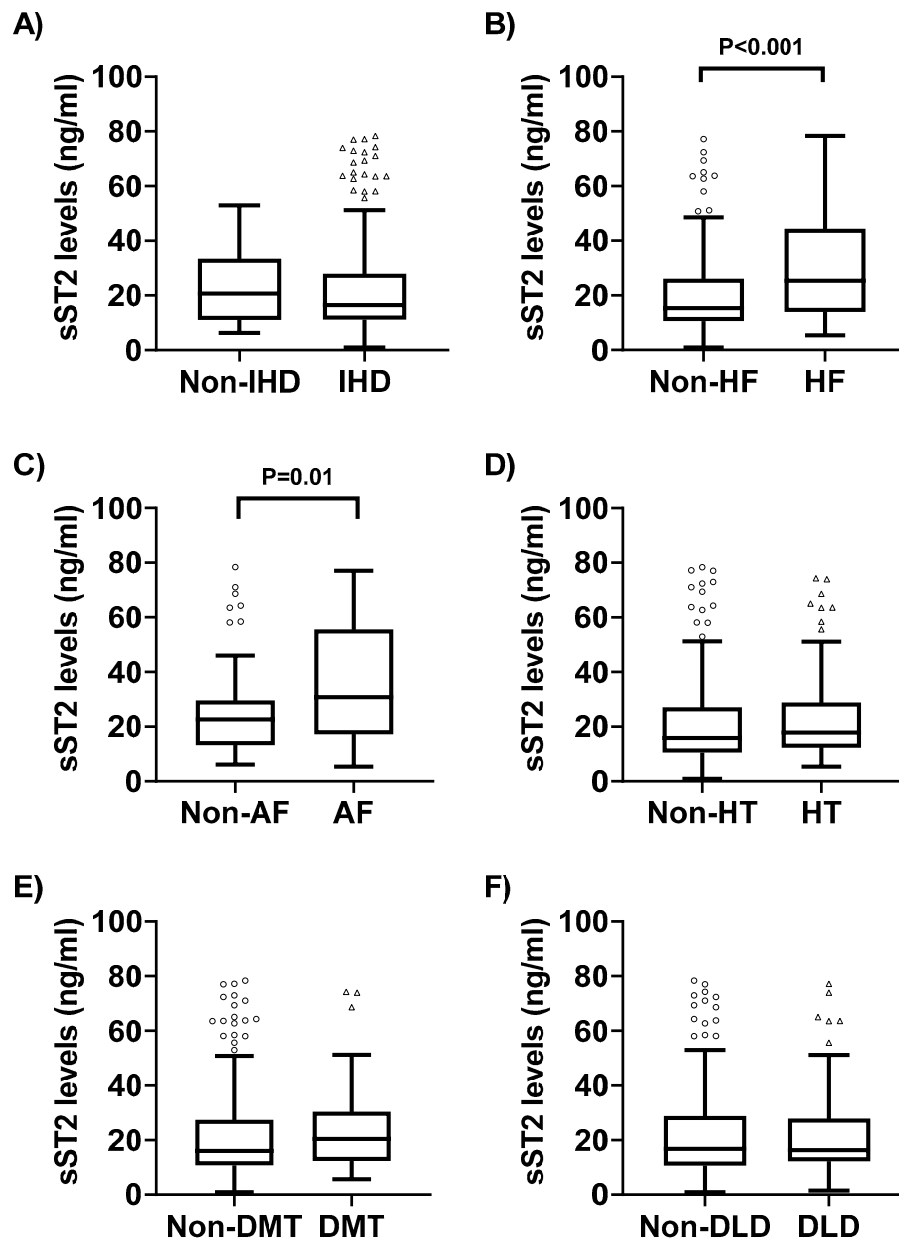

Supplementary Figure S1. Comparison of sST2 levels in patients with or without A) ischemic heart disease, B) heart failure, C) atrial fibrillation, D) hypertension, E) diabetes mellitus, F) dyslipidemia.
